# Supplementary material
Source: ML conference proceedings conference paper supplement (https://openreview.net/forum?id=mW7M0QsDbcw)
Supplement: supplementary_material [file attachment]

414 **A Appendix**

415 **A.1 Hardware Details**

416 We compute the number of logic gates required for each integer operation.

417 **A.2 Addition**

418 A half-adder (HA) circuit is made up of 1 XOR gate and 1 AND gate, while the full-adder (FA)  
 419 circuit requires 2 XOR gates, 2 AND gates and 1 OR gate. Therefore, the cost of an  $n$  bit addition is

$$\begin{aligned}
 & \text{HA} + (n - 1) \times \text{FA} \\
 &= (1 \text{ XOR} + 1 \text{ AND}) + (n - 1) \times (2 \text{ XOR} + 2 \text{ AND} + 1 \text{ OR}) \\
 &= (2n - 1) \text{ AND} + (2n - 1) \text{ XOR} + (n - 1) \text{ OR} \\
 &\approx 5n - 3
 \end{aligned}$$

420 **A.3 Multiplication**

421 A common architecture usually include  $(n - 1)$   $n$ -bit Adders besides the  $n^2$  AND gates, see Figure 5  
 422 top panels. One  $n$ -bit adders is composed of one half-adder (HA) and  $n - 1$  full-adder (FA). We will  
 423 consider a  $n$ -bit adder as building block in our theoretical analysis, although it could be optimized  
 424 further.

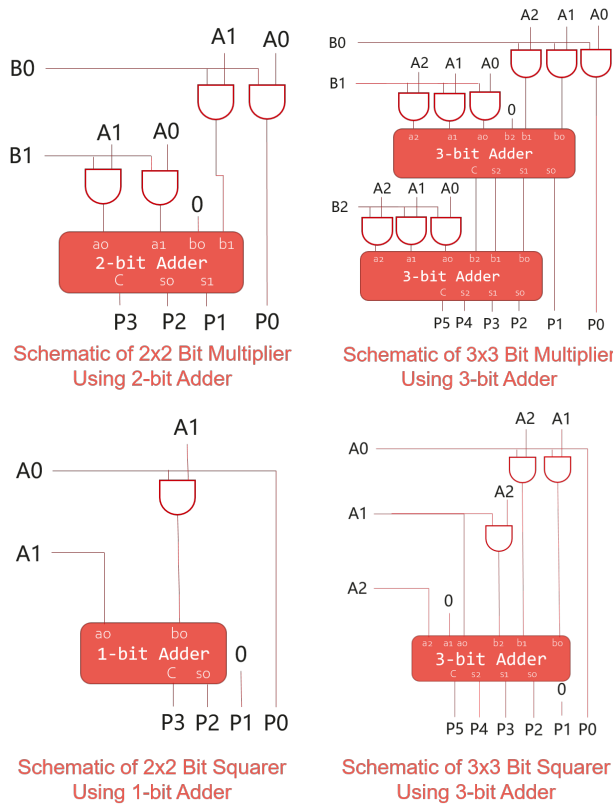

Figure 5: Binary multiplier (top panel) and binary squarer (bottom panels) for number of bits  $n = 2$  (left panels) and  $n = 3$  (right panels).

425 Hence the cost of multiplication is

$$\begin{aligned}
& n^2 \text{ AND} + (n - 1) \times (n - \text{bit Adder}) \\
& = n^2 \text{ AND} + (n - 1) \times \text{HA} + (n - 1)^2 \times \text{FA} \\
& = n^2 \text{ AND} + (n - 1) \times (1 \text{ XOR} + 1 \text{ AND}) + (n - 1)^2 \times (2 \text{ XOR} + 2 \text{ AND} + 1 \text{ OR}) \\
& = (3n^2 - 3n + 1) \text{ AND} + (2n^2 - 3n + 1) \text{ XOR} + (n^2 - 2n + 1) \text{ OR} \\
& \approx 6n^2 - 8n + 3
\end{aligned}$$

426 **A.4 Squaring**

427 In the case of squaring, we have less AND gates representing element-wise multiplication, because  
428 some values are repeated. We provide some examples in Figures 6 and 7.

|         |             |                     |                         | $A_3$               | $A_2$       | $A_1$    | $A_0$   |
|---------|-------------|---------------------|-------------------------|---------------------|-------------|----------|---------|
|         |             |                     |                         | $A_3$               | $A_2$       | $A_1$    | $A_0$   |
|         |             |                     |                         | $A_0A_3$            | $A_0A_2$    | $A_0A_1$ | $A_0^2$ |
|         |             |                     | $A_1A_3$                | $A_1A_2$            | $A_1^2$     | $A_1A_0$ | 0       |
|         |             | $A_2A_3$            | $A_2^2$                 | $A_2A_1$            | $A_2A_0$    | 0        | 0       |
| $A_3^2$ | $A_3A_2$    | $A_3A_1$            | $A_3A_0$                | 0                   | 0           | 0        | 0       |
| $A_3^2$ | $2(A_2A_3)$ | $A_2^2 + 2(A_1A_3)$ | $2(A_0A_3) + 2(A_1A_2)$ | $A_1^2 + 2(A_0A_2)$ | $2(A_0A_1)$ | $A_0^2$  | $A_0^2$ |

Figure 6: Binary Square for  $n = 4$  bits.

|         |             |                     |                      |                              | $A_4$                | $A_3$               | $A_2$       | $A_1$    | $A_0$   |
|---------|-------------|---------------------|----------------------|------------------------------|----------------------|---------------------|-------------|----------|---------|
|         |             |                     |                      |                              | $A_4$                | $A_3$               | $A_2$       | $A_1$    | $A_0$   |
|         |             |                     |                      |                              | $A_0A_4$             | $A_0A_3$            | $A_0A_2$    | $A_0A_1$ | $A_0^2$ |
|         |             |                     |                      | $A_1A_4$                     | $A_1A_3$             | $A_1A_2$            | $A_1^2$     | $A_1A_0$ | 0       |
|         |             |                     | $A_2A_4$             | $A_2A_3$                     | $A_2^2$              | $A_2A_1$            | $A_2A_0$    | 0        | 0       |
|         |             | $A_3A_4$            | $A_3^2$              | $A_3A_2$                     | $A_3A_1$             | $A_3A_0$            | 0           | 0        | 0       |
| $A_4^2$ | $A_4A_3$    | $A_4A_2$            | $A_4A_1$             | $A_4A_0$                     | 0                    | 0                   | 0           | 0        | 0       |
| $A_4^2$ | $2(A_3A_4)$ | $A_3^2 + 2(A_2A_4)$ | $2(A_1A_4 + A_2A_3)$ | $A_2^2 + 2(A_0A_4 + A_1A_3)$ | $2(A_0A_3 + A_1A_2)$ | $A_1^2 + 2(A_0A_2)$ | $2(A_0A_1)$ | $A_0^2$  | $A_0^2$ |

Figure 7: Binary Square for  $n = 5$  bits.

429 In Figures 6 and 7, we see that some sums are actually a multiplication by a factor of 2. Multiplication  
430 by a factor of 2 can instead be thought as a shift towards the left in the addition.

- 431 1. If  $n$  is **even**, then only the middle column will shift  $\lfloor \frac{n}{2} \rfloor = \frac{n}{2}$  values to the left. Also, the  
432 column on the left will have the term  $A_{\frac{n}{2}-1}^2$ . So, the sum with maximum number of elements,  
433  $\frac{n}{2} + 1$ , will only happen in one column,  $i = n - 1$ . Hence, we need  $\frac{n}{2} (n - 1)$ -bit adders.  
434 See Figure 8 for visual intuition.

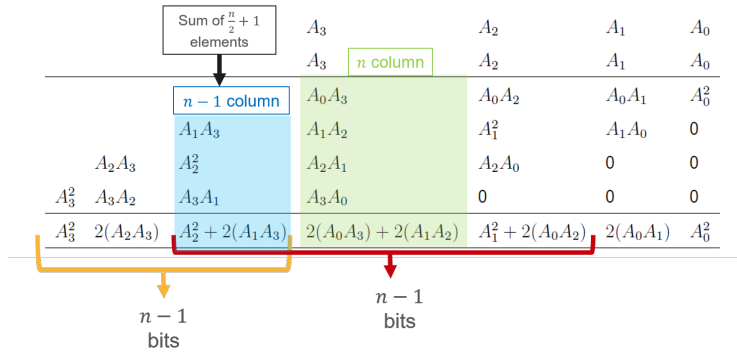

Figure 8: Intuition for square on  $n$  even.

435

Hence, the cost of squaring when  $n$  is even is:

$$\begin{aligned}
 & \frac{n(n-1)}{2} \text{ AND} + \frac{n}{2} \times ((n-1) - \text{bit Adder}) \\
 &= \frac{n(n-1)}{2} \text{ AND} + \frac{n}{2} \times \text{HA} + \frac{n}{2}(n-2) \times \text{FA} \\
 &= \frac{n(n-1)}{2} \text{ AND} + \frac{n}{2} \times (1 \text{ XOR} + 1 \text{ AND}) + \frac{n}{2}(n-2) \times (2 \text{ XOR} + 2 \text{ AND} + 1 \text{ OR}) \\
 &= \left(\frac{3}{2}n^2 - 2n\right) \text{ AND} + \left(n^2 - \frac{3}{2}n\right) \text{ XOR} + \left(\frac{1}{2}n^2 - n\right) \text{ OR} \\
 &\approx 3n^2 - \frac{9}{2}n
 \end{aligned}$$

436

2. If  $n$  is **odd**, column  $i = n-1, n, n+1$  will shift  $\lfloor \frac{n}{2} \rfloor = \frac{n-1}{2}$  values to the left. Since columns  $i = n-2, n$  both have an  $A_i^2$  term, the sum with maximum number of elements,  $\frac{n-1}{2} + 1$ , will happen at those columns. Hence, we need  $\frac{n-1}{2} n$ -bit adders. See Figure 9 for visual intuition.

437

438

439

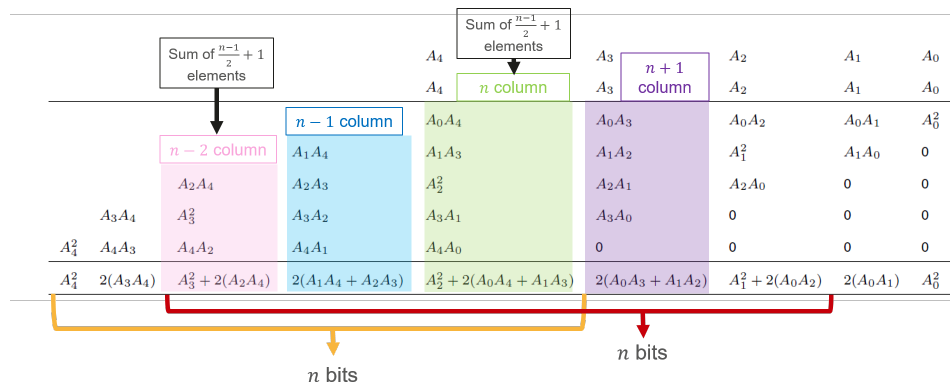

Figure 9: Intuition for square on  $n$  odd.

|                     |          | Similarity        | Gate Count                          |
|---------------------|----------|-------------------|-------------------------------------|
|                     |          | $S_{\text{conv}}$ | $6n^2 - 8n + 3$                     |
| $S_{\text{euclid}}$ | $n$ odd  |                   | $3n^2 + \frac{1}{2}n - \frac{3}{2}$ |
|                     | $n$ even |                   | $3n^2 + \frac{1}{2}n - 3$           |

Figure 10: Similarity operator Gate Count.

440

Hence, the cost of squaring when  $n$  is odd is:

$$\begin{aligned}
& \frac{n(n-1)}{2} \text{ AND} + \frac{n-1}{2} \times (n - \text{bit Adder}) \\
&= \frac{n(n-1)}{2} \text{ AND} + \frac{n-1}{2} \times \text{HA} + \frac{n-1}{2}(n-1) \times \text{FA} \\
&= \frac{n(n-1)}{2} \text{ AND} + \frac{n-1}{2} \times (1 \text{ XOR} + 1 \text{ AND}) + \frac{n-1}{2}(n-1) \times (2 \text{ XOR} + 2 \text{ AND} + 1 \text{ OR}) \\
&= \left(\frac{3}{2}n^2 - 2n + \frac{1}{2}\right) \text{ AND} + \left(n^2 - \frac{3}{2}n + \frac{1}{2}\right) \text{ XOR} + \left(\frac{1}{2}n^2 - n + \frac{1}{2}\right) \text{ OR} \\
&\approx 3n^2 - \frac{9}{2}n + \frac{3}{2}.
\end{aligned}$$

441

Moreover, in Figure 5 (bottom panels), we present the corresponding hardware schemes for

442

$n = 2, 3$ .

| Operation |          | Gate Count                          | Similarity          |         | Gate Count                          |
|-----------|----------|-------------------------------------|---------------------|---------|-------------------------------------|
| Add       |          | $5n - 3$                            | $S_{\text{conv}}$   |         | $6n^2 - 8n + 3$                     |
| Multiply  |          | $6n^2 - 8n + 3$                     | $S_{\text{euclid}}$ | $n$ odd | $3n^2 + \frac{1}{2}n - \frac{3}{2}$ |
| Square    | $n$ odd  | $3n^2 - \frac{9}{2}n + \frac{3}{2}$ |                     |         |                                     |
|           | $n$ even | $3n^2 - \frac{9}{2}n$               |                     |         |                                     |

Figure 11: Logic gate count for operations  $n$ -bit integers.
